# Supplementary material
Source: Springer Nature journal article supplement (https://www.springermedizin.de/resource/supplementary/12879_2009_1099_MOESM2_ESM.pdf/9441850)

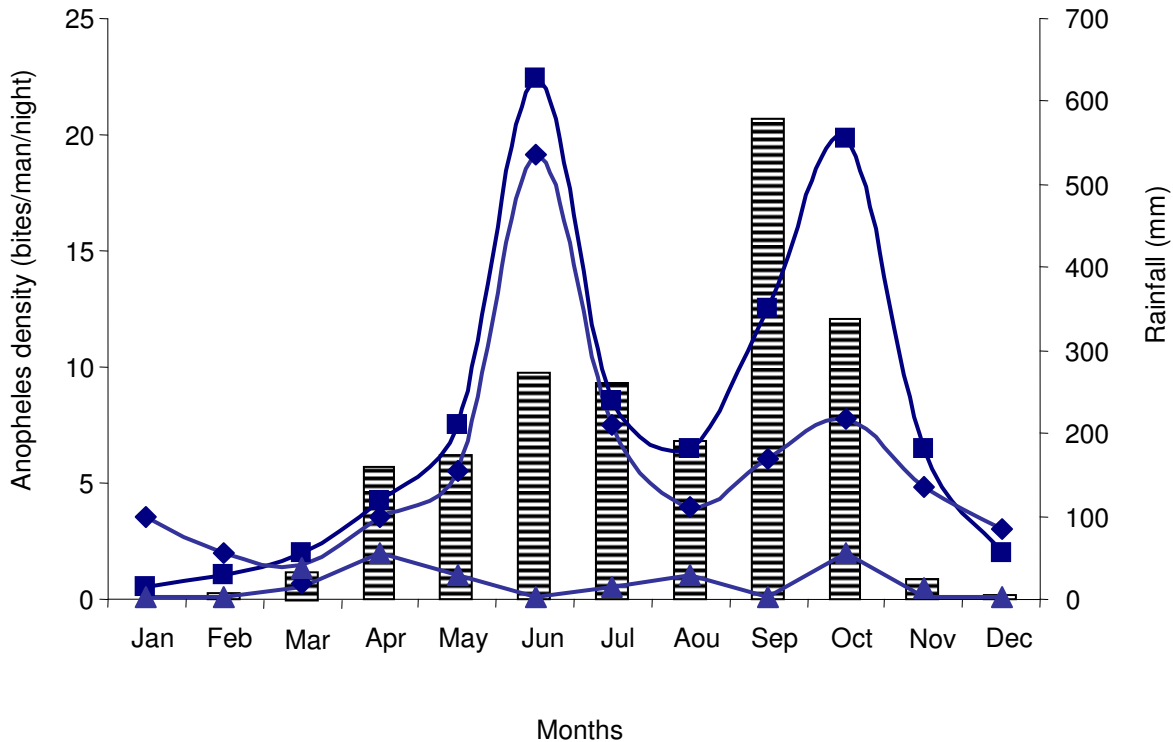

-  Rainfalls
-  HBR in Santchou plain (750 m)
-  HBR at Dschang plateau (1400 m)
-  HBR at Djuttitsa hill (1965 m)

Supplement: MOESM2 [file 9441850]
